# Supplementary material for: Development of an In Situ Analyzer Based on Sequential Injection Analysis and Liquid Waveguide Capillary Flow Cell for the Determination of Dissolved Reactive Phosphorus in Natural Waters
Source: MDPI journal article supplement (doi:10.3390/s20102967), 2020-05-24
Supplement: s1 [file s1]

# **Development of an In Situ Analyzer Based on Sequential Injection Analysis and Liquid Waveguide Capillary Flow Cell for the Determination of Dissolved Reactive Phosphorus in Natural Waters**

**Zeming Yang <sup>1,2</sup>, Cai Li <sup>1,3,\*</sup>, Zhenzhao Zhang <sup>1</sup>, Guixin Lu <sup>1</sup>, Zifeng Cai <sup>1</sup> and Wenxi Cao <sup>1</sup>**

<sup>1</sup> State Key Laboratory of Tropical Oceanography, South China Sea Institute of Oceanology, Chinese Academy of Sciences, Guangzhou 510301, China; zmyang@scsio.ac.cn (Z.Y.); zhangzhenzhao@scsio.ac.cn (Z.Z.); 11363996@qq.com (G.L.); caizifeng@scsio.ac.cn (Z.C.); wxcao@scsio.ac.cn (W.C.)

<sup>2</sup> University of Chinese Academy of Sciences, Beijing 100049, China

<sup>3</sup> Southern Marine Science and Engineering Guangdong Laboratory (Guangzhou), Guangzhou 511458, China

\* Correspondence: liclaire@scsio.ac.cn

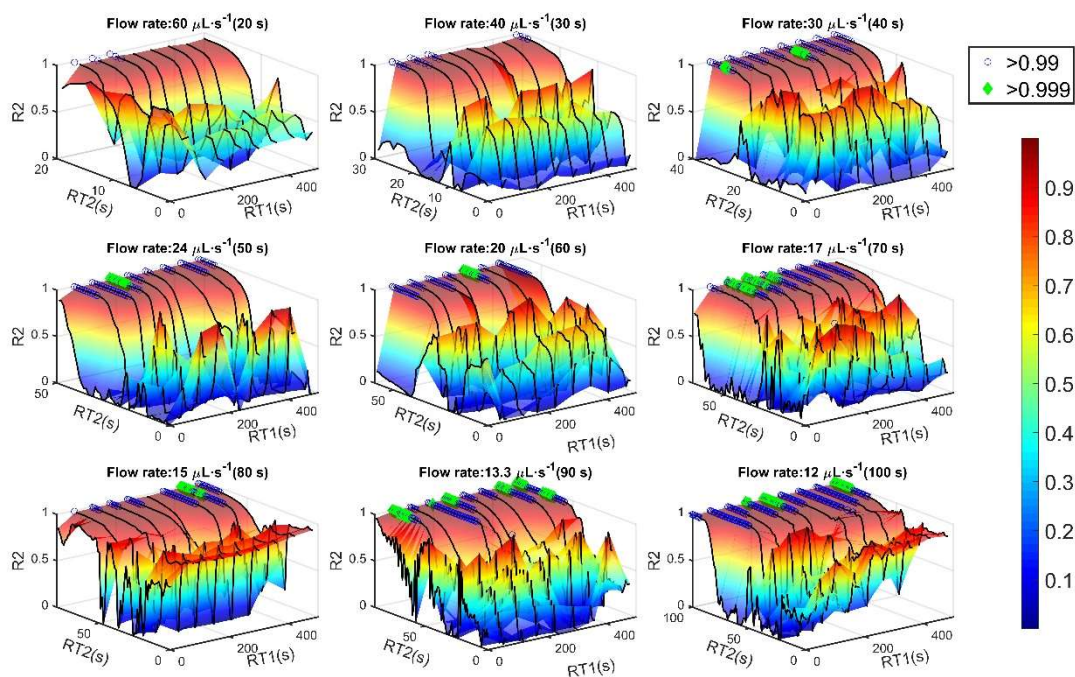

Figure S1.  $R^2$  values of curve fittings for different reaction times and push speeds.

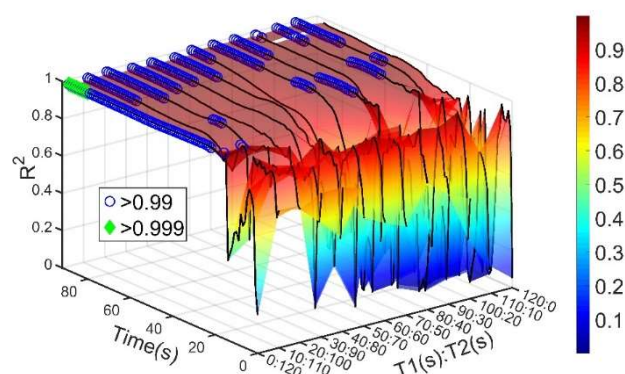

Figure S2.  $R^2$  values of curve fittings for different T1:T2 ratios and a total reaction time of 120 s.

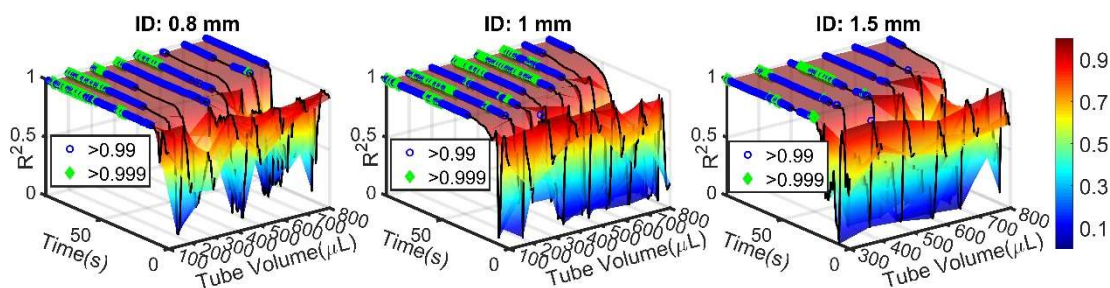

Figure S3.  $R^2$  values of curve fittings for different reaction coil lengths and IDs.

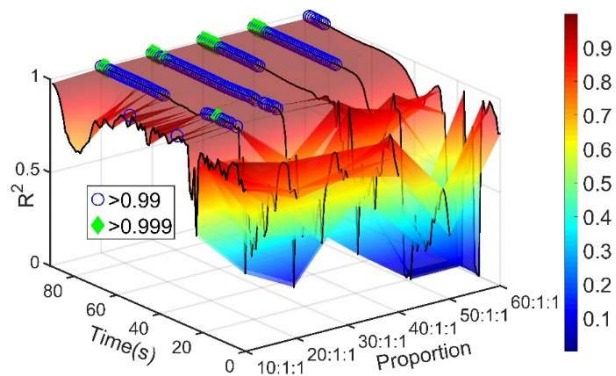

Figure S4.  $R^2$  values of curve fittings for different sample-to-reagent ratios.

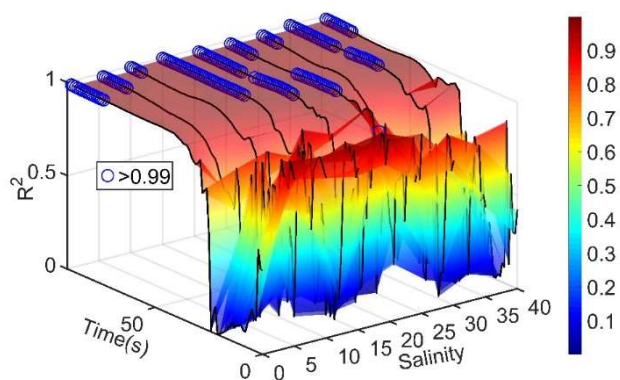

Figure S5.  $R^2$  values of curve fittings for different salinities.

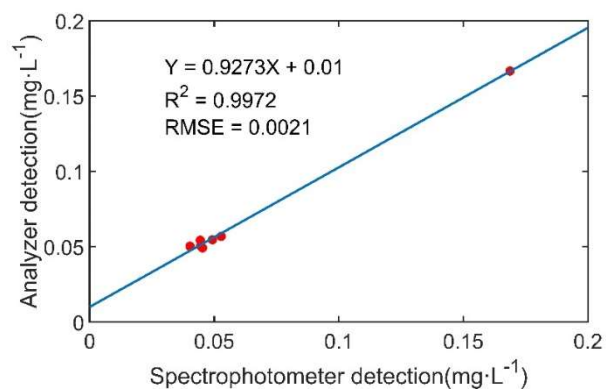

Figure S6. Comparison of the analyzer and spectrophotometer detection results.

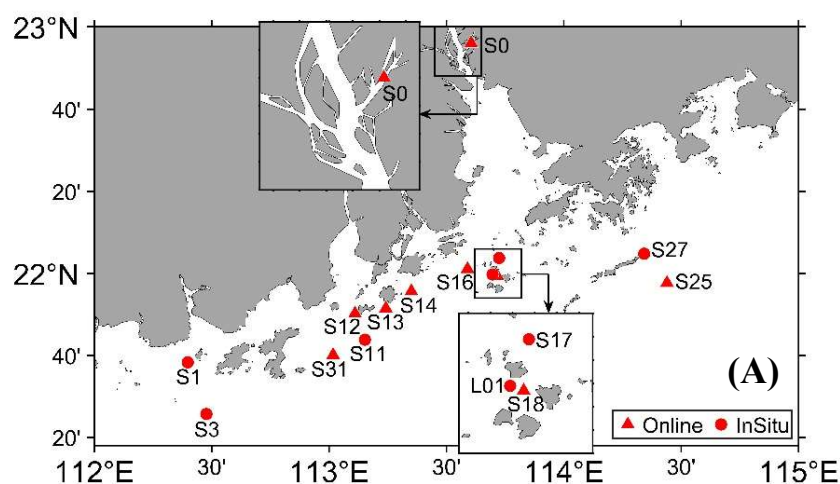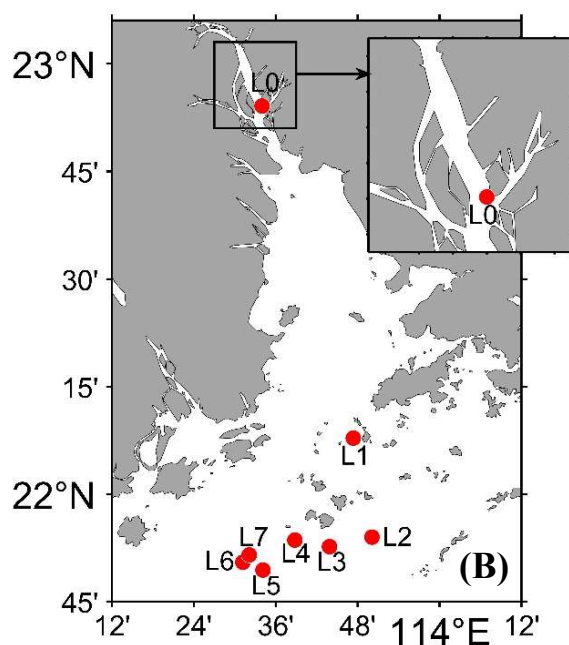

Figure S7. Locations of the stations on the two cruises. (A): “Healthy Ocean” cruise; (B) “Instrument Acceptance” cruise.

LOD calculation method:

The LOD is calculated by the following equation:

$$\text{LOD} = \frac{3S_0}{k}$$

Where  $S_0$  is the standard deviation of the blank samples for multiple parallel determinations, and  $k$  is the slope of the standard curve.

With this analyzer, the  $S_0$  ( $n = 10$ ) is 0.0011 and  $k$  is 2.39 (the concentration unit is  $\text{mg}\cdot\text{L}^{-1}$  of the standard curve), so the LOD is about  $1.4 \mu\text{g}\cdot\text{L}^{-1}$  and its corresponding molar concentration is  $14.7 \text{ nM}$  (the molecular weight of  $\text{PO}_4^{3-}$  is 95).
